# Supplementary material for: Thermal tipping points in mediterranean mussel adhesion: molecular mechanisms and mechanical consequences of heatwave on byssus production in Mytilus galloprovincialis
Source: Springer Nature journal article supplement (doi:10.1038/s41598-025-08708-6), 2025-07-09
Supplement: MOESM1 [file 41598_2025_8708_MOESM1_ESM.docx]

**Supplementary information**

*Biometrical analysis of mussels*


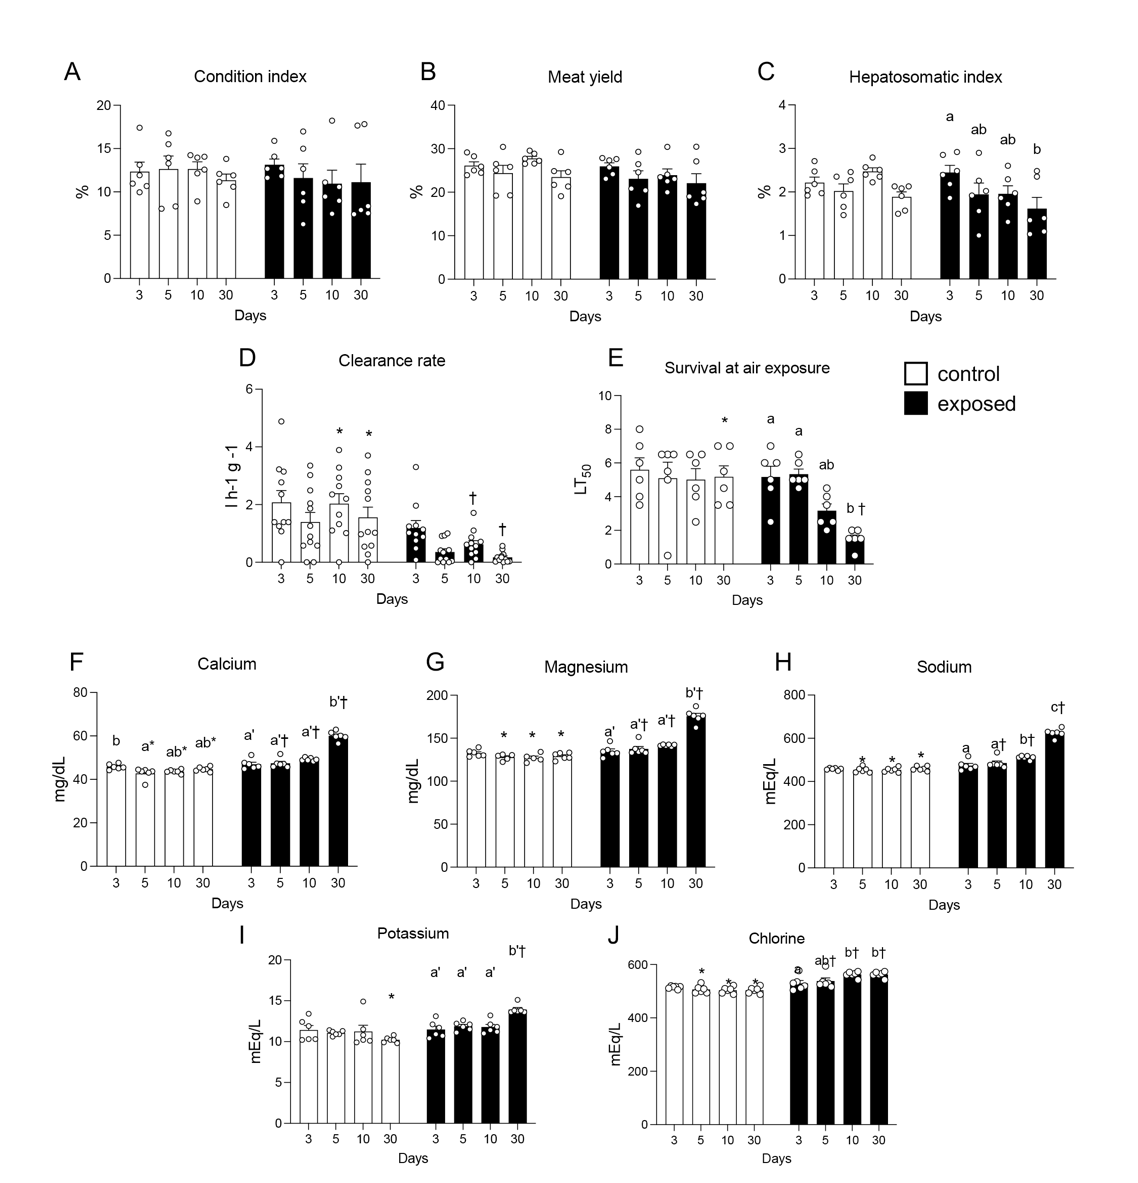


**Figure S1. Biometric indices.**

(A – J) Condition Index (A), Meat Yield (B), Hepatosomatic index (C), Clearance rate (D), Survival at air exposure (E), Calcium (F), Magnesium (G), Sodium (H), Potassium (I) and Chloride (J) hemolymphatic concentrations. White histograms represent the control group, black histograms the exposed ones.

Two-way ANOVA and Tukey’s post hoc test were used.

Data are shown as average value ± SEM. Lowercase letters (abc, group Ctrl; a’b’, group Exp) indicate significant differences in Tukey’s multiple comparison (P < 0.05) factor “time” among the same group. The symbols (*, †) indicate significant differences (P < 0.05) factor “treatment” between groups.

Condition index: two-way ANOVA, factor “time”: F (3.40) = 0.4368, p=0.7278; factor “temperature”: F (1.40) = 0.3137, p=0.5786; interaction: F (3.40) = 0.3160, p=0.8137.

Meat yield: two-way ANOVA, factor “time”: F (3.40) = 2.368, p=0.7278; factor “temperature”: F (1.40) = 2.596, p= 0.1150; interaction: F (3.40) = 0.5525, p= 0.6494.

Hepatosomatic index: two-way ANOVA, factor “time”: F (3.40) = 4.070, p= 0.0129; factor “temperature”: F (1.40) = 1.536, p= 0.2225; interaction: F (3.40) = 1.530, p= 0.2215.

Clearance rate: two-way ANOVA, factor “time”: F (3.85) = 3.684, p= 0.0151; factor “temperature”: F (1.85) = 37.31, p <0.0001; interaction: F (3.85) = 0.4384, p= 0.7261.

Survival at air exposure: two-way ANOVA, factor “time”: F (3.40) = 4.995, p= 0.0049; factor “temperature”: F (1.40) = 10.73, p= 0.0022; interaction: F (3, 40) = 4,017, p= 0.0137.

Calcium: two-way ANOVA, factor “time”: F (3.40) = 39.32, p <0.0001; factor “temperature”: F (1.40) = 166.0, p <0.0001; interaction: F (3.40) = 34.67, p <0.0001.

Magnesium: two-way ANOVA, factor “time”: F (3.38) = 35.55, p <0.0001; factor “temperature”: F (1.38) = 130.3, p <0.0001; interaction: F (3.38) = 38.93, p <0.0001.

Sodium: two-way ANOVA, factor “time”: F (3.40) = 59.66, p <0.0001; factor “temperature”: F (1.40) = 214.7, p <0.0001; interaction: F (3.40) = 52.25, p <0.0001.

Potassium: two-way ANOVA, factor “time”: F (3.40) = 1.100, p= 0.3602; factor “temperature”: F (1. 40) = 20.26, p <0.0001; interaction: F (3.40) = 8.240, p= 0.0002.

Chloride: two-way ANOVA, factor “time”: F (3.40) = 1.751, p= 0.1720; factor “temperature”: F (1.40) = 72.14, p <0.0001; interaction: F (3.40) = 5.002, p= 0.0049.

No significant difference in the condition index (A) and meat yield (B) were observed, while at the same time HSI decreased in the exposed group (p = 0.0129) (C). Clearance rate was affected by the temperature (p < 0.0001) with the exposed group which showed lower values at 10, 30 days compared to the control group and slightly by the time (p = 0.0151) (D). Survival at air exposure decreased significantly at higher temperatures (p = 0.0022) and declined further over time only in the exposed group (time × temperature interaction: p = 0.0137). Specifically, survival during air exposure in the exposed group was significantly lower at 30 days compared to both the initial exposure and the control group at the same time point (p = 0.0030) (E). Temperature affected calcium (F), magnesium (G) and sodium (H) concentrations equally which showed a significant temperature, time and time x temperature effect (p < 0.0001), Specifically, values were highest at day 30 compared to the other time points in the exposed group where the values increased already at day 10 for the sodium. The concentrations started to be different between the groups after 5 days. Potassium (I) and chloride (J) concentrations were higher in the exposed group (temperature effect with p < 0.0001) and by the interaction time-temperature (p = 0.0002 for potassium and p = 0.0049 for chloride). The potassium concentration in the exposed group at 30 days was higher than the other time points and the same time in the control group. The chloride concentration at 3 days in the exposed group was lower than the concentration at 10 and 30 days, moreover at 5, 10, 30 was significantly different from the values at the same times in the control group.


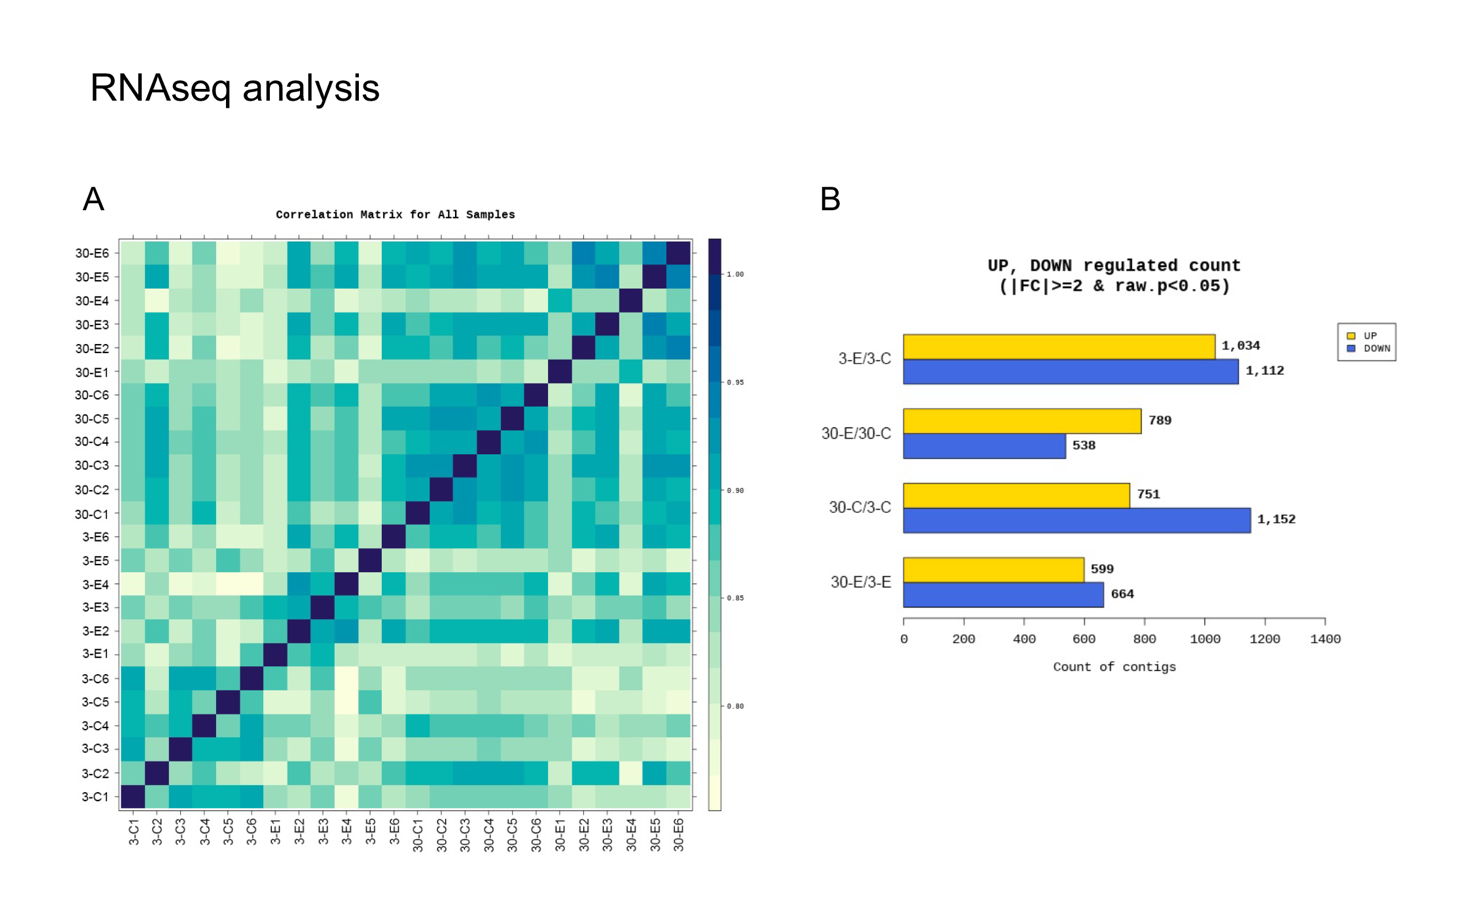


**Figure S2. RNAseq general readouts**

1. Correlation matrix for all the sequenced samples.
2. The graph shows the total number of statistically significant up- and down-regulated genes in the four different comparisons.


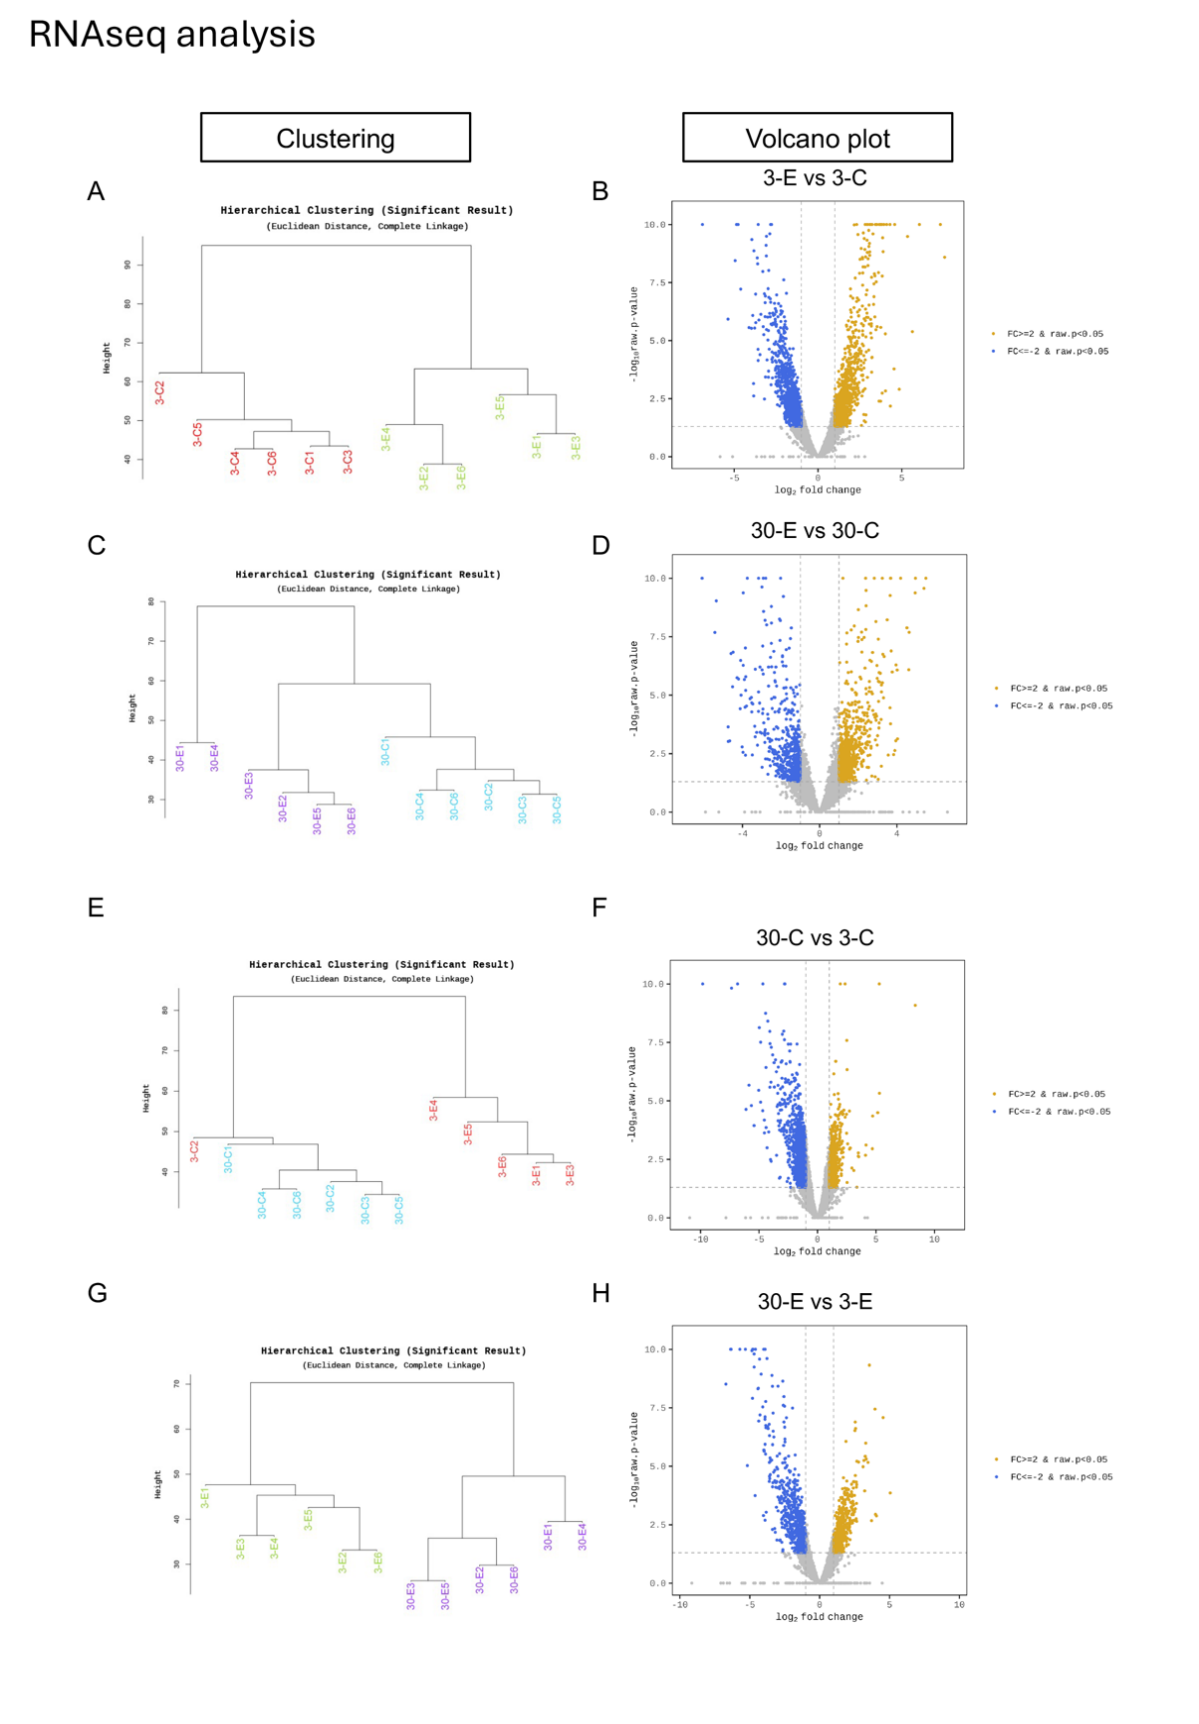


**Figure S3. Gene expression representation of RNAseq data**

(A – H) Graphs show the representation of the group clusters generated by the absolute quantification of transcripts (A, C, E, G) and, for each comparison, the statistically significant differentially expressed genes, represented as volcano plot (B, D, F, H).


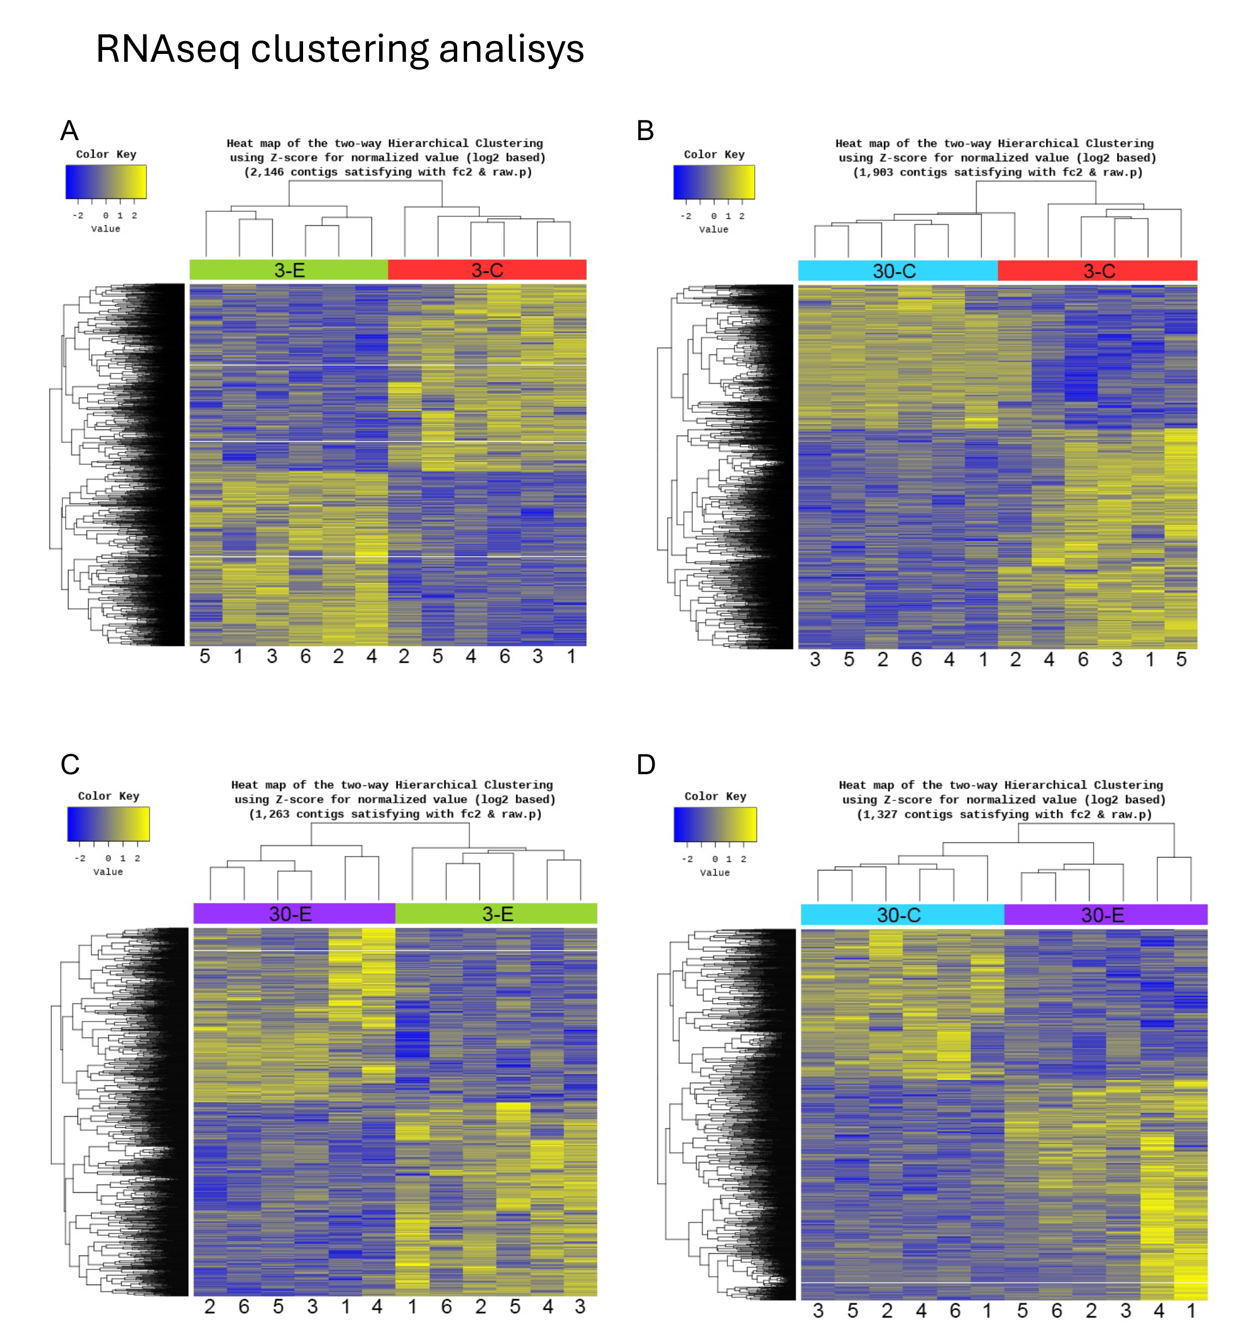


**Figure S4. Heatmap representation of RNAseq analysis**

(A – D) Heatmap representation of RNAseq absolute quantification of gene expression for all the comparisons included in the study: 3-E vs. 3-C (A), 30-C vs. 3-C (B), 30-E vs. 3-E (C), 30-C vs. 30-E (D).





**Figure S5. Housekeeping gene analysis for relative quantification of gene expression using qPCR**

(A – B) Graph shows the quantification cycle (Cq) for each housekeeping gene (A) with the relative statistics within the whole considered experimental set (B), performed randomly including one sample per experimental group. Since the genome of the mussel is not annotated, all the housekeeping genes and related primers for the qPCR amplification were selected from published available data.

1. The graph shows the results from the second experiment including the housekeeping genes resulted with the best performs from the firs experiment (*18S1*, *GAPDH*), replicated on all the samples of all the experimental groups. Each violin plot represents the whole experimental set to show the distribution of the expression of each housekeeping gene.

(D – E) Graphs show the gene expression of the two selected housekeeping genes, 181S (D) and GAPDH (H).





**Figure S6. Alternative representation of the qPCR expression analysis of pre-collagen genes**

(A – B) Graphs show the relative gene expression of *preCOL-P* gene in the control (A) and exposed group (B), using the first considered time point (3 days) for the normalization. The analysis shows the time-dependent gene expression changes of the *preCOL-P* within each group.

(C) Since the *preCOL-P* gene expression resulted modified by the time, an alternative representation has been included in the figure. The graph shows the relative gene expression of preCOL-P gene in both control (white columns) and exposed (black columns) groups, all normalized on “control day 3” group.

(D – E) Graphs show the relative gene expression of *preCOL-D* gene in the control (D) and exposed group (E), using the first considered time point (3 days) for the normalization. The analysis shows the time-dependent gene expression changes of the *preCOL-D* within each group.

(F – G) Graphs show the relative gene expression of *preCOL-NG* gene in the control (F) and exposed group (G), using the first considered time point (3 days) for the normalization. The analysis shows the time-dependent gene expression changes of the *preCOL-NG* within each group.

Single values for each experimental groups are shown as white dots, while columns represent mean + SEM. For graph A, B, D, E, F, G, Kruskal-Wallis’s test was performed, followed by Dunn’s *post hoc*. For graph C, Mann-Whitney’s test was performed between exposed and control groups at the same time point.

For the *preCOL-P* analysis a statistically significant difference within control groups emerged due to the time variable (Kruskal-Wallis’s test, p = 0.0027), with an increase of gene expression after 10 and 30 days, compared to 3 days (Dunn’s post hoc, 10 days, p = 0.0116; 30 days, p = 0.0116) (A). In the exposed groups, no differences resulted from the time-related analysis (B). The analysis between exposed and control groups at each considered time, showed temperature-dependent gene expression increase at 3 days (Mann-Whitney’s test, p = 0.0087) and a strong decrease at 30 days (Mann-Whitney’s test, p = 0.0152) (C).

No differences due to the time emerged within the control and exposed groups for preCOL-D (D, E) and preCOL-NG (F, G).


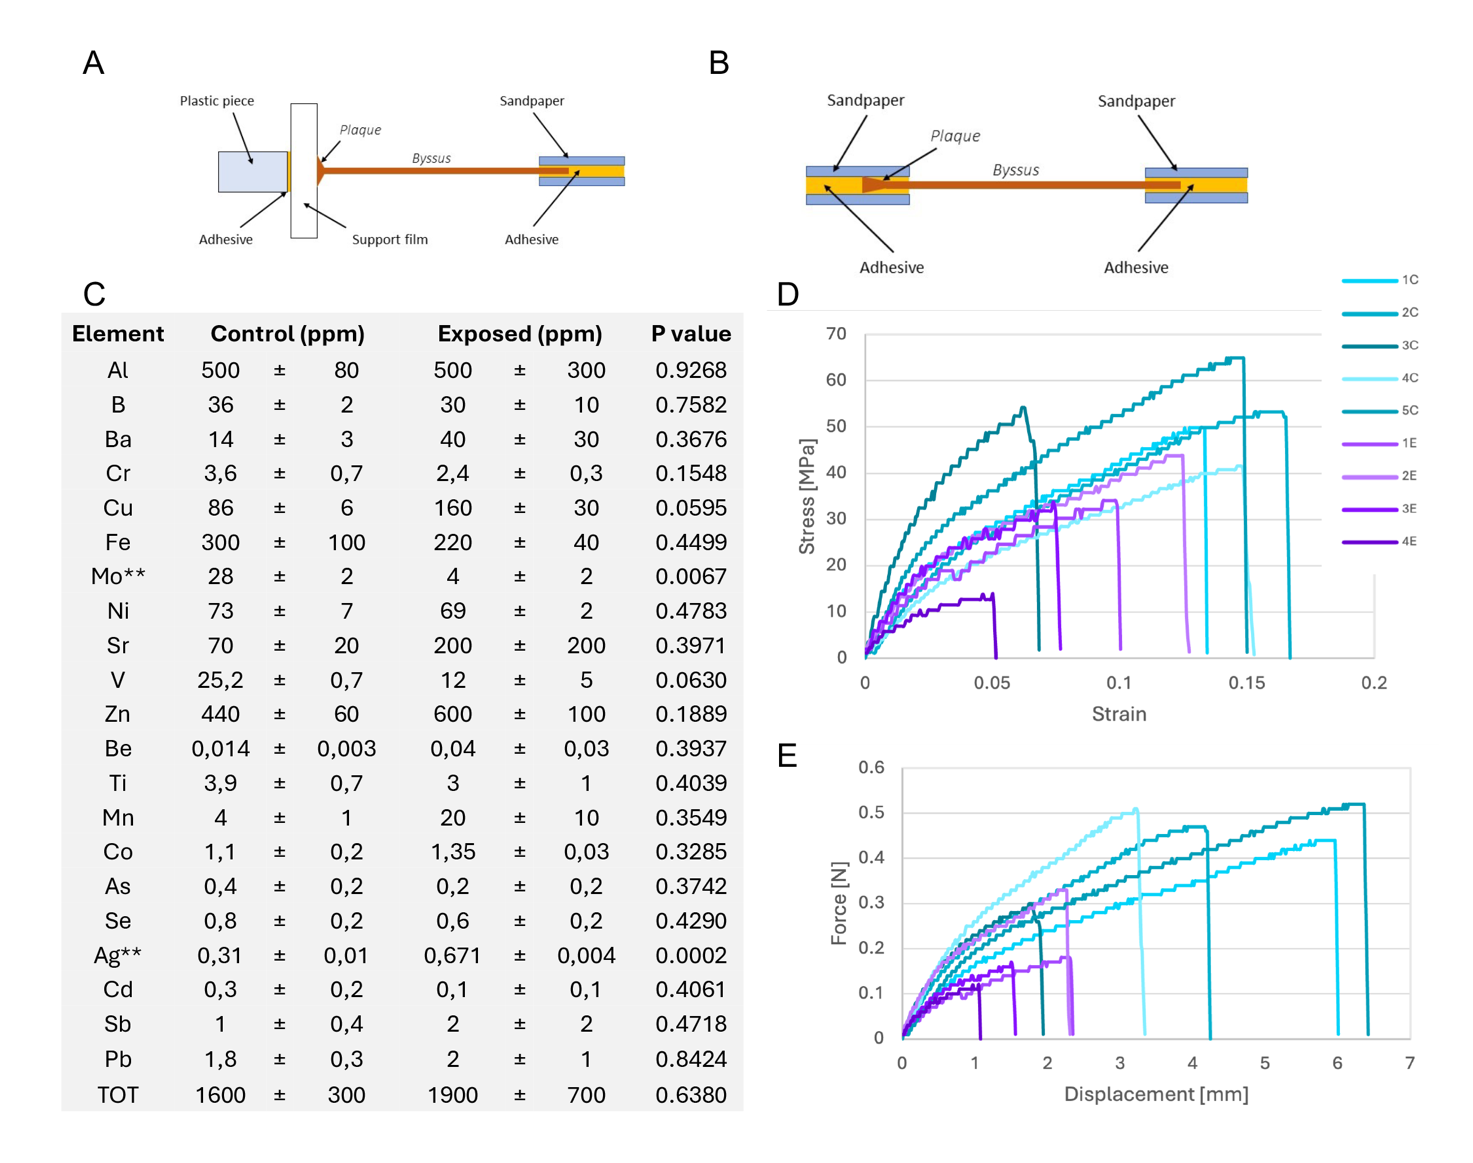


**Figure S7. Byssus filament analysis**

(A - B) Scheme assembly of a byssus filament for plaque (A) and thread traction test (B).

(C) Elemental byssal threads composition. ICP-MS measurement of the elemental content inside the byssus of the control and exposed mussels after 30 day of exposure. Data are reported as mean value ± standard deviation (N=2). Asterisks represent a statistically significant difference between the groups (** p < 0.01) through Unpaired t-test.

(D - E) Stress-strain (D) and displacement-force (E) curves for thread of exposed and control groups. All curves have the same shape, and no sudden rupture nor abrupt changes in slope or irregular trends are found for any samples. For both the control and exposed group, a noticeable variability can be observed among different samples, clearly detectable by the curves. However, this variability appears characteristic of the material and consistent with the different geometric characteristics of the threads, and is not influenced by exposure.


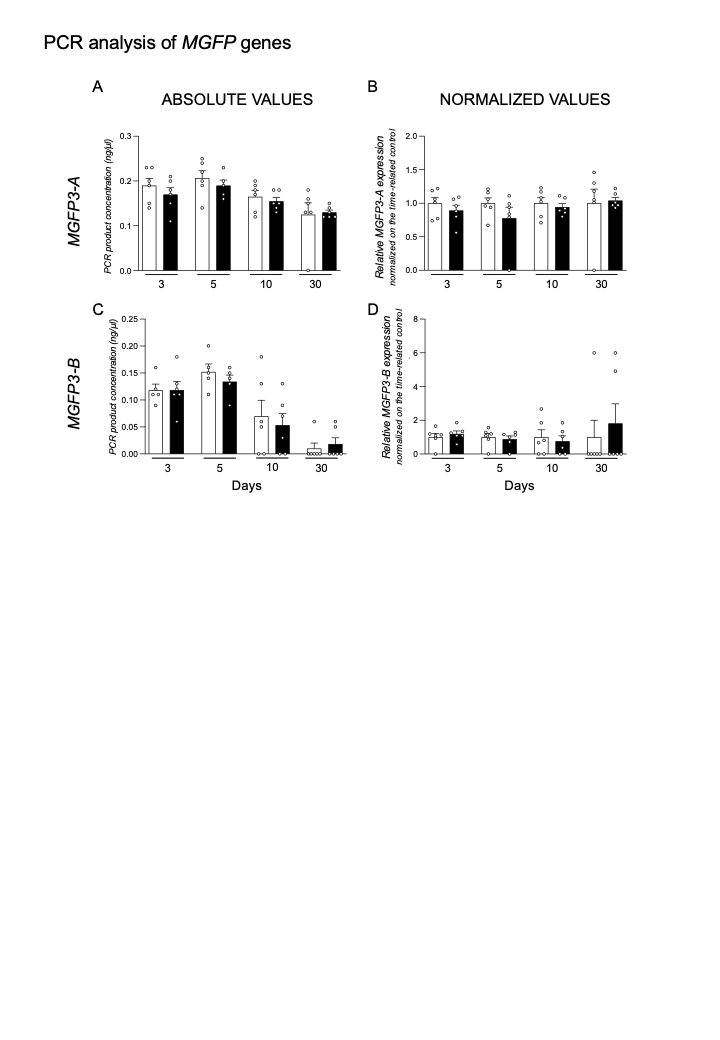


**Figure S8. Gene expression analysis performed by PCR and agarose gel electrophoresis analysis**

(A – B) Graphs show the quantification of *MGFP3-A* gene expression using the absolute value expressed in ng/µl (A), and the data normalized on control group (white column) within each considered time point (B).

(C – D) Graphs show the quantification of *MGFP3-B* gene expression using the absolute value expressed in ng/µl (C), and the data normalized on control group (white column) within each considered time point (D).

Since the genome of the mussel is not annotated, primers sequences and the strategy of MGFP-3 gene expression quantification analysis were selected from published available data (see Material & Methods online section).

Statistical analysis. Student’s t-test between exposed and control groups within the same exposure time. No statistically significant differences emerged from the analysis.
